# Supplementary material for: Characteristics of Urban Flood Resilience Evolution and Analysis of Influencing Factors: A Case Study of Yingtan City, China
Source: MDPI journal article supplement (doi:10.3390/w16060834), 2024-03-13
Supplement: s1 [file s1]

---

Supplementary material for

# **Characteristics of Urban Flood Resilience Evolution and Analysis of Influencing Factors: A Case Study of Yingtan City, China**

**Donghai Yuan <sup>1</sup>, Hui Wang <sup>1</sup>, Chen Wang <sup>2,\*</sup>, Chenling Yan <sup>3</sup>, Lili Xu <sup>4</sup>, Chunyang Zhang <sup>2</sup>,  
Jiazhao Wang <sup>2</sup> and Yingying Kou <sup>1,\*</sup>**

- <sup>1</sup> Key Laboratory of Urban Stormwater System and Water Environment,  
Ministry of Education,  
Beijing University of Civil Engineering and Architecture, Beijing 100044,  
China
- <sup>2</sup> CAUPD(Beijing) Planning & Design Consultants Co., Ltd., Beijing 100044,  
China
- <sup>3</sup> Municipal Institute of City Management, Beijing 100028, China;  
yanchenling@aliyun.com
- <sup>4</sup> China Railway Construction Network Information Technology Co., Ltd.,  
Beijing 100043, China; 13426478876@163.com

**This supplement has 14 pages containing detailed information includes:**

**Supplementary table: Table S1–S6.**

**Table S1.** Questionnaire of expert

| Primary indicator         | Secondary indicator                                             | Scoring area             |                          |                          |                          |                          |
|---------------------------|-----------------------------------------------------------------|--------------------------|--------------------------|--------------------------|--------------------------|--------------------------|
|                           |                                                                 | Extremely                | Impor                    | General                  | Not                      | Least                    |
|                           |                                                                 | Important                | tant                     | Importance               | Important                | Important                |
| Socio-economic resilience | Per capital GDP                                                 | <input type="checkbox"/> |
|                           | Local fiscal expenditure                                        | <input type="checkbox"/> |
|                           | Proportion of tertiary industry to GDP                          | <input type="checkbox"/> |
|                           | Number of healthcare workers per 10 000 population              | <input type="checkbox"/> |
|                           | Percentage of population aged over 60 and under 18              | <input type="checkbox"/> |
|                           | Number of students in ordinary institutions of higher education | <input type="checkbox"/> |
|                           | Unemployment rate                                               | <input type="checkbox"/> |
|                           | Density of population                                           | <input type="checkbox"/> |
|                           | Per capita public                                               | <input type="checkbox"/> |
|                           |                                                                 |                          |                          |                          |                          |                          |
|                           |                                                                 |                          |                          |                          |                          |                          |
|                           |                                                                 |                          |                          |                          |                          |                          |

|                |                       |                          |                          |                          |                          |                          |
|----------------|-----------------------|--------------------------|--------------------------|--------------------------|--------------------------|--------------------------|
| resilience     | green areas           |                          |                          |                          |                          |                          |
|                | Proportion of unused  |                          |                          |                          |                          |                          |
|                | land area             | <input type="checkbox"/> |
|                | Comprehensive         |                          |                          |                          |                          |                          |
|                | utilization rate of   |                          |                          |                          |                          |                          |
|                | general industrial    | <input type="checkbox"/> |
|                | solid waste           |                          |                          |                          |                          |                          |
|                | Green coverage rate   |                          |                          |                          |                          |                          |
|                | of built-up area      | <input type="checkbox"/> |
|                | Centralized treatment |                          |                          |                          |                          |                          |
| Infrastructure | rate of sewage        | <input type="checkbox"/> |
|                | treatment plant       |                          |                          |                          |                          |                          |
|                | Surface area of lakes |                          |                          |                          |                          |                          |
|                | and rivers            | <input type="checkbox"/> |
|                | Land development      |                          |                          |                          |                          |                          |
|                | intensity             | <input type="checkbox"/> |
|                | Number of hospital    |                          |                          |                          |                          |                          |
|                | beds per 10 000       | <input type="checkbox"/> |
|                | population            |                          |                          |                          |                          |                          |
|                | Proportion of rural   |                          |                          |                          |                          |                          |
| resilience     | residential areas and | <input type="checkbox"/> |
|                | industrial and        |                          |                          |                          |                          |                          |

|                        |                          |                          |                          |                          |                          |
|------------------------|--------------------------|--------------------------|--------------------------|--------------------------|--------------------------|
| mining land            |                          |                          |                          |                          |                          |
| Per capita refuge area | <input type="checkbox"/> |
| Density of road        |                          |                          |                          |                          |                          |
| network in built       | <input type="checkbox"/> |
| district               |                          |                          |                          |                          |                          |
| Number of internet     | <input type="checkbox"/> |
| broadband users        |                          |                          |                          |                          |                          |
| Communication          | <input type="checkbox"/> |
| coverage               |                          |                          |                          |                          |                          |
| Number of buses per    | <input type="checkbox"/> |
| 10,000 people          |                          |                          |                          |                          |                          |
| Density of sewers in   | <input type="checkbox"/> |
| built district         |                          |                          |                          |                          |                          |
| Central city pumping   | <input type="checkbox"/> |
| capacity               |                          |                          |                          |                          |                          |

**Table S2.**Expert background

| Expert      | Work Field     | Years<br>in Field | Highest<br>Degree | Department               |
|-------------|----------------|-------------------|-------------------|--------------------------|
| Expert<br>A | Urban Planning | 25                | Bachelor'<br>s    | Government<br>Department |

|             |                                     |    |            |                          |
|-------------|-------------------------------------|----|------------|--------------------------|
| Expert<br>B | Urban Emergency Management          | 31 | Bachelor's | Government<br>Department |
| Expert<br>C | Sponge City                         | 18 | Master's   | Research Institute       |
| Expert<br>D | Urban Flood Control and<br>Drainage | 15 | Doctorate  | Research Institute       |
| Expert<br>E | Urban Flood Control and<br>Drainage | 20 | Doctorate  | Research Institute       |

**Table S3.** Calculation of the final combined weight of the 5 experts' questionnaires.

| Primary<br>indicator         | Primary<br>indicator<br>weight | Secondary<br>indicator                                                    | Socio-economic<br>resilience<br>weight | Ecological<br>resilience<br>weight | Infrastructure<br>resilience<br>weight | Flood<br>resilience<br>weight |
|------------------------------|--------------------------------|---------------------------------------------------------------------------|----------------------------------------|------------------------------------|----------------------------------------|-------------------------------|
| Socio-economic<br>resilience | 0.4244                         | Per capita<br>GDP (A1)                                                    | 0.3940                                 | 0                                  | 0                                      | 0.1672                        |
|                              |                                | Local<br>fiscal<br>expenditure (A2)                                       | 0.1787                                 | 0                                  | 0                                      | 0.0759                        |
|                              |                                | Number<br>of<br>healthcare<br>workers<br>per 10<br>000<br>population (A3) | 0.0852                                 | 0                                  | 0                                      | 0.0362                        |
|                              |                                | Percentage of<br>population<br>aged<br>over 60<br>and under               | 0.1384                                 | 0                                  | 0                                      | 0.0587                        |

|                                      |        |                                                                              |        |        |        |        |
|--------------------------------------|--------|------------------------------------------------------------------------------|--------|--------|--------|--------|
|                                      |        | 18 (A4)                                                                      |        |        |        |        |
| Ecologic<br>al<br>resilienc<br>e     | 0.1856 | Unemplo<br>yment<br>rate (A5)                                                | 0.0426 | 0      | 0      | 0.0181 |
|                                      |        | Density<br>of<br>populatio<br>n (A6)                                         | 0.1611 | 0      | 0      | 0.0684 |
|                                      |        | Per capita<br>public<br>green<br>areas (B1)                                  | 0      | 0.2117 | 0      | 0.0393 |
|                                      |        | Green<br>coverage<br>rate of<br>built-up<br>area (B2)                        | 0      | 0.1916 | 0      | 0.0355 |
|                                      |        | Centralize<br>d<br>treatment<br>rate of<br>sewage<br>treatment<br>plant (B3) | 0      | 0.0515 | 0      | 0.0096 |
|                                      |        | Surface<br>area of<br>lakes and<br>rivers<br>(B4)                            | 0      | 0.2524 | 0      | 0.0468 |
|                                      |        | Land<br>developm<br>ent<br>intensity<br>(B5)                                 | 0      | 0.2929 | 0      | 0.0543 |
|                                      |        | Number<br>of<br>hospital<br>beds per<br>10 000<br>populatio<br>n (C1)        | 0      | 0      | 0.1176 | 0.0459 |
| Infrastru<br>cture<br>resilienc<br>e | 0.3900 |                                                                              |        |        |        |        |

---

|                                                               |   |   |        |        |
|---------------------------------------------------------------|---|---|--------|--------|
| Per capita<br>refuge<br>area (C2)                             | 0 | 0 | 0.1648 | 0.0643 |
| Density<br>of road<br>network<br>in built<br>district<br>(C3) | 0 | 0 | 0.1736 | 0.0677 |
| Communi<br>cation<br>coverage<br>(C4)                         | 0 | 0 | 0.0732 | 0.0286 |
| Density<br>of sewers<br>in built<br>district<br>(C5)          | 0 | 0 | 0.2841 | 0.1108 |
| Central<br>city<br>pumping<br>capacity<br>(C6)                | 0 | 0 | 0.1867 | 0.0728 |

---

**Table S4.** Statistical data of various indicators in Yingtan City from 2010 to 2022.

| Primary indicator         | Secondary index                                         | Unit             | 2010  | 2011  | 2012  | 2013   | 2014   | 2015   | 2016   | 2017   | 2018   | 2019   | 2020   | 2021   | 2022   |
|---------------------------|---------------------------------------------------------|------------------|-------|-------|-------|--------|--------|--------|--------|--------|--------|--------|--------|--------|--------|
| Socio-economic resilience | Per capita GDP (A1)                                     | Yuan/person      | 30999 | 38172 | 43744 | 49969  | 54302  | 56896  | 61709  | 64712  | 69923  | 79833  | 84139  | 99069  | 107111 |
|                           | Local fiscal expenditure (A2)                           | 100 million Yuan | 40.81 | 68.12 | 88.05 | 100.37 | 114.97 | 127.74 | 128.03 | 128.35 | 140.18 | 155.06 | 188.97 | 188.65 | 208.42 |
|                           | Number of healthcare workers per 10 000 population (A3) | person           | 54.69 | 55.72 | 57.37 | 60.83  | 62.48  | 62.78  | 64.78  | 68.89  | 68.53  | 70.33  | 70.19  | 75.60  | 80.46  |
|                           | Percentage of population aged over 60 and under 18 (A4) | %                | 29.10 | 29.56 | 29.99 | 30.44  | 30.88  | 31.33  | 31.77  | 32.24  | 32.70  | 33.16  | 34.02  | 34.05  | 34.50  |
|                           | Unemployment rate (A5)                                  | %                | 3.50  | 3.50  | 3.50  | 3.50   | 3.20   | 2.98   | 3.00   | 2.98   | 2.98   | 2.91   | 3.28   | 3.20   | 3.27   |



|                              |                                                                           |                            |       |       |       |       |       |       |       |       |       |       |       |       |       |
|------------------------------|---------------------------------------------------------------------------|----------------------------|-------|-------|-------|-------|-------|-------|-------|-------|-------|-------|-------|-------|-------|
| Ecologic<br>al<br>resilience | Density of<br>population<br>(A6)                                          | person/<br>km <sup>2</sup> | 2761  | 2659  | 3460  | 3449  | 3702  | 3503  | 3093  | 3107  | 3023  | 3378  | 3348  | 3371  | 2904  |
|                              | Per capita<br>public<br>green areas<br>(B1)                               | m <sup>2</sup>             | 12.69 | 13.13 | 12.39 | 14.27 | 13.29 | 15.86 | 15.29 | 23.79 | 17.34 | 13.96 | 15.11 | 17.34 | 20.66 |
|                              | Green<br>coverage<br>rate of<br>built-up<br>area (B2)                     | %                          | 47.34 | 37.84 | 38.91 | 40.45 | 41.34 | 45.15 | 41.30 | 46.74 | 40.94 | 46.19 | 44.03 | 46.19 | 47.57 |
|                              | Centralize<br>d treatment<br>rate of<br>sewage<br>treatment<br>plant (B3) | %                          | 77.90 | 93.49 | 94.73 | 93.78 | 94.22 | 97.54 | 97.66 | 97.05 | 95.76 | 95.67 | 95.25 | 96.11 | 97.70 |
|                              | Surface<br>area of<br>lakes and<br>rivers (B4)                            | km <sup>2</sup>            | 12.15 | 12.40 | 12.38 | 12.47 | 12.40 | 12.17 | 11.88 | 11.71 | 11.47 | 11.35 | 11.24 | 11.22 | 10.71 |
|                              | Land<br>developme<br>nt intensity<br>(B5)                                 | %                          | 0.67  | 0.86  | 0.90  | 0.93  | 0.94  | 0.95  | 1.10  | 1.11  | 1.39  | 1.39  | 1.57  | 1.62  | 1.62  |

|                              |                                                    |                    |       |       |       |       |       |       |       |       |       |       |       |       |       |
|------------------------------|----------------------------------------------------|--------------------|-------|-------|-------|-------|-------|-------|-------|-------|-------|-------|-------|-------|-------|
| Infrastructure<br>resilience | Number of hospital beds per 10 000 population (C1) | sheet              | 25.71 | 28.78 | 33.68 | 40.49 | 43.31 | 43.49 | 45.10 | 62.05 | 61.28 | 62.87 | 70.19 | 68.22 | 69.76 |
|                              | Per capita refuge area (C2)                        | m <sup>2</sup>     | 3.36  | 3.39  | 3.41  | 4.00  | 4.45  | 4.66  | 5.13  | 5.69  | 5.97  | 6.36  | 6.96  | 7.85  | 8.48  |
|                              | Density of road network in built district (C3)     | km/km <sup>2</sup> | 5.36  | 4.16  | 3.97  | 3.85  | 3.96  | 3.93  | 3.75  | 4.60  | 6.28  | 6.48  | 7.46  | 8.28  | 8.30  |
|                              | Communication coverage (C4)                        | %                  | 54.88 | 61.78 | 71.87 | 72.84 | 72.65 | 71.45 | 77.17 | 68.14 | 77.94 | 93.62 | 94.75 | 97.49 | 100.0 |
|                              | Density of sewers in built district (C5)           | km/km <sup>2</sup> | 2.58  | 2.57  | 2.45  | 5.24  | 5.17  | 5.15  | 4.46  | 6.68  | 9.34  | 6.48  | 7.64  | 15.12 | 15.94 |
|                              | Central city                                       | m <sup>3</sup> /s  | 25.76 | 27.33 | 32.75 | 34.56 | 35.23 | 39.05 | 41.71 | 47.13 | 50.35 | 52.96 | 58.20 | 64.00 | 67.61 |

---

---

pumping  
capacity  
(C6)

---

**Table S5.** Classification of flood resilience index of Yingtian City in 2016.

| Secondary index                                         | Unit                   | Level 1      | Level 2       | Level 3     | Level 4     | Level 5         |
|---------------------------------------------------------|------------------------|--------------|---------------|-------------|-------------|-----------------|
| Per capita GDP (A1)                                     | Yuan/person            | 10987~31714  | 31715~46408   | 46409~66231 | 66232~95113 | 95114~207163    |
| Local fiscal expenditure (A2)                           | 100 million Yuan       | 19.41~287.53 | 287.53~543.18 | 543.18~925  | 925~1727.72 | 1727.72~6191.56 |
| Number of healthcare workers per 10 000 population (A3) | person                 | 0~25         | 25~30         | 30~35       | 35~40       | >40             |
| Percentage of population aged over 60 and under 18 (A4) | %                      | >25          | 20~25         | 15~20       | 10~15       | 0~10            |
| Unemployment rate (A5)                                  | %                      | 7.68~16.55   | 4.34~7.67     | 2.54~4.33   | 1.28~2.53   | 0.08~1.27       |
| Density of population (A6)                              | person/km <sup>2</sup> | 6939~13369   | 4543~6938     | 2851~4542   | 1580~2850   | 121~1579        |
| Per capita public green areas (B1)                      | m <sup>2</sup>         | 2.50~8.53    | 8.54~12.33    | 12.34~16.61 | 16.62~24.58 | 24.59~46.88     |
| Green coverage rate of built-up area (B2)               | %                      | 12.03~23.26  | 23.27~31.78   | 31.79~39.30 | 39.31~43.49 | 43.50~51.37     |
| Centralized treatment rate of sewage                    | %                      | 42.07~68.68  | 68.69~83.54   | 83.55~90.42 | 90.43~95.55 | 95.56~100       |

|                                                                   |        |                 |                 |                 |                 |                  |
|-------------------------------------------------------------------|--------|-----------------|-----------------|-----------------|-----------------|------------------|
| treatment<br>plant (B3)                                           |        |                 |                 |                 |                 |                  |
| Surface<br>area of<br>lakes and<br>rivers (B4)                    | km2    | 0~7             | 7~9             | 9~11            | 11~13           | >13              |
| Land<br>developme<br>nt intensity<br>(B5)                         | %      | 19.71~46<br>.23 | 8.66~19.7<br>0  | 4.19~8.6<br>5   | 1.52~4.1<br>8   | 0.02~1.51        |
| Number of<br>hospital<br>beds per<br>10 000<br>population<br>(C1) | sheet  | 14.31~38<br>.19 | 38.20~50.<br>97 | 50.98~65<br>.29 | 65.30~85<br>.35 | 85.36~138.<br>64 |
| Per capita<br>refuge area<br>(C2)                                 | m2     | 0~0.5           | 0.5~1.5         | 1.5~2.5         | 2.5~3.5         | >3.5             |
| Density of<br>road<br>network in<br>built<br>district<br>(C3)     | km/km2 | 2.74~5.7<br>9   | 5.80~8.35       | 8.36~12.<br>22  | 12.23~18<br>.70 | 18.71~35.6<br>4  |
| Communic<br>ation<br>coverage<br>(C4)                             | %      | 50~60           | 60~70           | 70~80           | 80~90           | 90~100           |
| Density of<br>sewers in<br>built<br>district<br>(C5)              | km/km2 | 0.98~6.8<br>6   | 6.87~10.7<br>8  | 10.79~16<br>.48 | 16.49~30<br>.51 | 30.52~61.9<br>0  |
| Central<br>city<br>pumping<br>capacity<br>(C6)                    | m3/s   | 0~2             | 2~10            | 10~50           | 50~200          | >200             |

**Table S6.** Classification of flood resilience index of Yingtian City in 2022.

| Secondary index                                         | Unit                   | Level 1     | Level 2     | Level 3      | Level 4       | Level 5       |
|---------------------------------------------------------|------------------------|-------------|-------------|--------------|---------------|---------------|
| Per capita GDP (A1)                                     | Yuan/person            | 19915~49885 | 49886~70999 | 71000~100824 | 100825~142721 | 142722~218118 |
| Local fiscal expenditure (A2)                           | 100 million Yuan       | 26.81~40.68 | 40.68~80.66 | 80.66~17.07  | 170.68~315.25 | 315.25~84.31  |
| Number of healthcare workers per 10 000 population (A3) | person                 | 0~25        | 25~30       | 30~35        | 35~40         | >40           |
| Percentage of population aged over 60 and under 18 (A4) | %                      | >25         | 20~25       | 15~20        | 10~15         | 0~10          |
| Unemployment rate (A5)                                  | %                      | 15.85~63.55 | 6.99~15.84  | 3.99~6.98    | 2.15~3.98     | 0.21~2.14     |
| Density of population (A6)                              | person/km <sup>2</sup> | 6800~12677  | 4565~6800   | 2938~4565    | 1670~2938     | 109~1670      |
| Per capita public green areas (B1)                      | m <sup>2</sup>         | 1.37~9.98   | 9.99~14.53  | 14.54~18.65  | 18.66~28.62   | 28.63~49.27   |
| Green coverage rate of built-up area (B2)               | %                      | 9.39~25.27  | 25.28~37.09 | 37.10~42.39  | 42.40~46.71   | 46.72~64.36   |
| Centralized treatment rate of                           | %                      | 71.99~86.00 | 86.01~93.20 | 93.21~96.60  | 96.61~98.66   | 98.67~100.00  |

---

|                                                                   |                        |                 |                 |                 |                 |                  |
|-------------------------------------------------------------------|------------------------|-----------------|-----------------|-----------------|-----------------|------------------|
| sewage<br>treatment<br>plant (B3)                                 |                        |                 |                 |                 |                 |                  |
| Surface<br>area of<br>lakes and<br>rivers (B4)                    | km <sup>2</sup>        | 0~7             | 7~9             | 9~11            | 11~13           | >13              |
| Land<br>developme<br>nt intensity<br>(B5)                         | %                      | 29.56~48.<br>55 | 13.56~29.<br>55 | 5.68~13.5<br>5  | 1.87~5.67       | 0.01~1.86        |
| Number of<br>hospital<br>beds per<br>10 000<br>population<br>(C1) | sheet                  | 23.75~43.<br>40 | 43.41~54.<br>55 | 54.56~67.<br>62 | 67.63~88.<br>73 | 88.74~500<br>.00 |
| Per capita<br>refuge area<br>(C2)                                 | m <sup>2</sup>         | 0~0.5           | 0.5~1.5         | 1.5~2.5         | 2.5~3.5         | >3.5             |
| Density of<br>road<br>network in<br>built<br>district<br>(C3)     | km/k<br>m <sup>2</sup> | 0.76~5.05       | 5.06~7.24       | 7.25~9.02       | 9.03~11.5<br>1  | 11.52~18.<br>43  |
| Communic<br>ation<br>coverage<br>(C4)                             | %                      | 50~60           | 60~70           | 70~80           | 80~90           | 90~100           |
| Density of<br>sewers in<br>built<br>district<br>(C5)              | km/k<br>m <sup>2</sup> | 0.35~6.78       | 6.79~10.5<br>1  | 10.52~14.<br>91 | 14.92~21.<br>61 | 21.62~36.<br>06  |
| Central<br>city<br>pumping<br>capacity<br>(C6)                    | m <sup>3</sup> /s      | 0~2             | 2~10            | 10~50           | 50~200          | >200             |

---
